# Supplementary material for: Covalently functionalized poly(etheretherketone) implants with osteogenic growth peptide (OGP) to improve osteogenesis activity
Source: Royal Society of Chemistry journal article supplement (doi:10.1039/d0ra00103a), 2020-01-01
Supplement: d0ra00103a1.pdf [file d0ra00103a1.pdf]

## Supporting information

### **Covalently functionalized poly(etheretherketone) implants with osteogenic growth peptide (OGP) to improve osteogenesis activity**

Maihemuti Yakufu,<sup>ab</sup> Zongliang Wang,<sup>b</sup> Yu Wang,<sup>b</sup> Zixue Jiao,<sup>b</sup> Min Guo,<sup>b</sup> Jianguo Liu<sup>\*a</sup>  
and Peibiao Zhang<sup>\*b</sup>

*a. Department of Orthopaedics, The First Hospital of Jilin University, Changchun, Jilin 130021, China. E-mail: jianguoliujlu@yeah.net*

*b. Key Laboratory of Polymer Ecomaterials, Changchun Institute of Applied Chemistry, Chinese Academy of Sciences, Changchun 130022, China. E-mail: zhangpb@ciac.ac.cn*

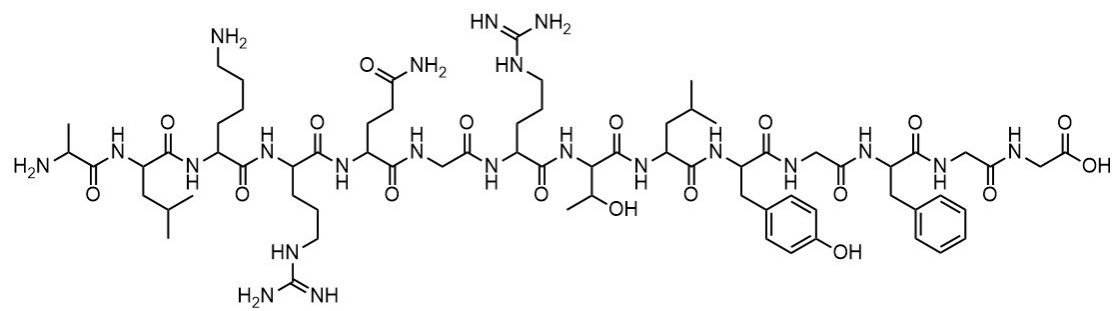

**Figure S1.** The structural formula of OGP peptide.
